# Supplementary material for: Corona-Associated Mucormycosis: Case Series Reports and Review of the Literature
Source: MDPI journal article supplement (doi:10.3390/jof10050305), 2024-04-24
Supplement: s1 [file s1]

**Table S1.** Laboratory analyses.

| <i>Parameter</i>                   | <i>Value</i>                   | <i>Reference Range</i>        |
|------------------------------------|--------------------------------|-------------------------------|
| WBC, cells/mm <sup>3</sup>         | 8.7x10 <sup>3</sup>            | 4.00-10.00 x10 <sup>3</sup>   |
| Neutrophils, cells/mm <sup>3</sup> | 4.38 x10 <sup>3</sup>          | 2.4 - 6.5 x10 <sup>3</sup>    |
| Lymphocytes, cells/mm <sup>3</sup> | 7.29 x10 <sup>3*</sup>         | 1.00 - 4.00 x10 <sup>3</sup>  |
| RBC, cells/mm <sup>3</sup>         | 3.71 x 10 <sup>6*</sup>        | 3.80 – 5.20 x 10 <sup>6</sup> |
| Hemoglobin, g/dL                   | 11.7                           | 11.7 - 16.1                   |
| MCV, fl                            | 87.9 fl                        | 80.0 – 100.0                  |
| PLT, cells/mm <sup>3</sup>         | 220 x 10 <sup>3</sup>          | 150 – 450 x 10 <sup>3</sup>   |
| Fibrinogen, mg/dL                  | 988*                           | 200 – 393                     |
| C-reactive protein, mg/L           | 297*                           | 0 - 5.0                       |
| Procalcitonin, ng/mL               | 0.44*                          | 0.00 – 0.05                   |
| Prothrombin time, percentage       | 65%*                           | 70-140                        |
| D-dimer, ng/mL                     | 1109*                          | 0 – 198                       |
| Glycemia, mg/dL                    | 225*                           | 82-115                        |
| Ferritin, ng/mL                    | 500*                           | 13 – 150                      |
| ALAT, U/L                          | 184*                           | 0 - 55                        |
| ASAT, U/L                          | 111*                           | 5 - 35                        |
| Urea, mg/dL                        | 18.00                          | 9.8 – 20.1                    |
| Creatinine, mg/dL                  | 0.46*                          | 0.57 – 1.11                   |
| SARS-CoV-2 Ag                      | pozitive*                      | negative                      |
| Blood cultures                     | negative                       | negative                      |
| Nasal secretion culture            | <i>Aspergillus spp</i> *       | negative                      |
|                                    | <i>Proteus mirabilis</i> *     |                               |
|                                    | <i>Klebsiella pneumoniae</i> * |                               |

WBC – white blood cells; RBC – red blood cells; MCV - mean corpuscular volume; PLT – platelets; ALAT - alanine aminotransferase; ASAT - aspartate aminotransferase; Ag – antigen, \* – pathological values.
