# Supplementary material for: Corona-Associated Mucormycosis: Case Series Reports and Review of the Literature
Source: MDPI journal article supplement (doi:10.3390/jof10050305), 2024-04-24
Supplement: s1 [file s1]

**Table S3.** Laboratory analyses.

| <i>Parameter</i>                   | <i>Value</i>                                                         | <i>Reference Range</i>        |
|------------------------------------|----------------------------------------------------------------------|-------------------------------|
| WBC, cells/mm <sup>3</sup>         | 9.72 x10 <sup>3</sup>                                                | 4.00-10.00 x10 <sup>3</sup>   |
| Neutrophils, cells/mm <sup>3</sup> | 6.49 x10 <sup>3</sup>                                                | 2.4 - 6.5 x10 <sup>3</sup>    |
| Lymphocytes, cells/mm <sup>3</sup> | 2.50 x10 <sup>3</sup>                                                | 1.00 - 4.00 x10 <sup>3</sup>  |
| RBC, cells/mm <sup>3</sup>         | 4.94x 10 <sup>6</sup>                                                | 3.80 – 5.20 x 10 <sup>6</sup> |
| Hemoglobin, g/dL                   | 13.7                                                                 | 11.7 - 16.1                   |
| MCV, fl                            | 85.1                                                                 | 80.0 – 100.0                  |
| MCH, pg                            | 27.6                                                                 | 27.0 – 34.0                   |
| PLT, cells/mm <sup>3</sup>         | 273 x 10 <sup>3</sup>                                                | 150 – 450 x 10 <sup>3</sup>   |
| Fibrinogen, mg/dL                  | 651*                                                                 | 200 – 393                     |
| C-reactive protein, mg/L           | 27.40*                                                               | 0 - 5.0                       |
| Procalcitonin, ng/mL               | 0.80*                                                                | 0.00 – 0.05                   |
| Prothrombin time, percentage       | 80 %                                                                 | 70-140                        |
| D-dimer, ng/mL                     | 235*                                                                 | 0 – 198                       |
| Glycémie, mg/dL                    | 100*                                                                 | 82-115                        |
| Ferritin, ng/mL                    | 888.18*                                                              | 13 – 150                      |
| ALAT, U/L                          | 6                                                                    | 0 - 55                        |
| ASAT, U/L                          | 11                                                                   | 5 - 35                        |
| Urea mg/dL                         | 159*                                                                 | 9.8 – 20.1                    |
| Creatinine mg/dL                   | 4.98*                                                                | 0.57 – 1.11                   |
| Blood cultures                     | negative                                                             | negative                      |
| Nasal secretion culture            | Echerichia coli pozitive*<br>Staphylococcus aureus MRSA<br>pozitive* | negative                      |

WBC – white blood cells; RBC – red blood cells; MCV - mean corpuscular volume; PLT – platelets; ALAT - alanine aminotransferase; ASAT - aspartate aminotransferase; Ag – antigen, \* – pathological values.
